# Supplementary material for: A Predictive Model for Toxicity Effects Assessment of Biotransformed Hepatic Drugs Using Iterative Sampling Method
Source: PubMed Central journal article supplement (PMC5146749; doi:10.1038/srep38660), 2016-12-09
Supplement: srep38660-s1.pdf [file srep38660-s1.pdf]

# Supplementary Information for: A Predictive Model for Toxicity Effects Assessment of Biotransformed Hepatic Drugs Using Iterative Sampling Method

Alaa Tharwat<sup>1,2,\*</sup>, Yasmine S. Moemen<sup>2,3</sup>, About Ella Hassanien<sup>2,4,\*</sup>

<sup>1</sup>Faculty of Engineering, Suez Canal University, Egypt

<sup>2</sup>Scientific Research Group in Egypt, (SRGE), <http://www.egyptscience.net>

<sup>3</sup>Clinical Pathology Department, National Liver Institute, Menoufia University, Egypt

<sup>4</sup>Faculty of Computers and Information, Cairo University, Egypt

## Supplementary Figures

1. Fig. S1: An example of SMOTE method, (a) before applying SMOTE method and (b) after applying SMOTE method.
2. Fig. S2: An example of ITS method. (a) Original data; (b) After applying sampling step; (c) The identified Tomek Links, (d) The dataset after removing Tomek links.
3. Fig. S3: ITS algorithm.
4. Fig. S4: Bagging Classifier Algorithm.

### 1-Supplementary Figure S1

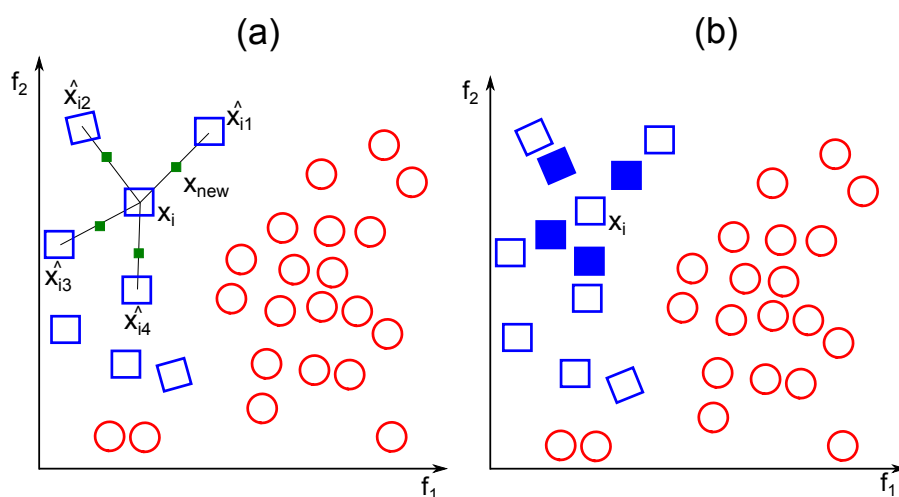

Fig. S1 An example of SMOTE method, (a) before applying SMOTE method and (b) after applying SMOTE method.

Figure S1 illustrates an example of the SMOTE method. Figure S1(a) shows a typical imbalanced data distribution, where the circles and squares represent samples of the majority and minority classes, respectively. In this example, assume  $k = 4$ . Figure S1(a) shows the created samples along with the line segment between  $x_i$  and  $\hat{x}_{ij}$ . These samples are highlighted by the green square shape. These synthetic samples increase the number of minority samples and hence, significantly improves the performance of learning algorithm. Figure S1(b) shows the synthesized samples that are highlighted by solid squares. However, in SMOTE algorithm, the same number of the synthetic data are generated for each minority sample without consideration to neighboring samples, which may increase the overlapping between classes.

## 2-Supplementary Figure S2

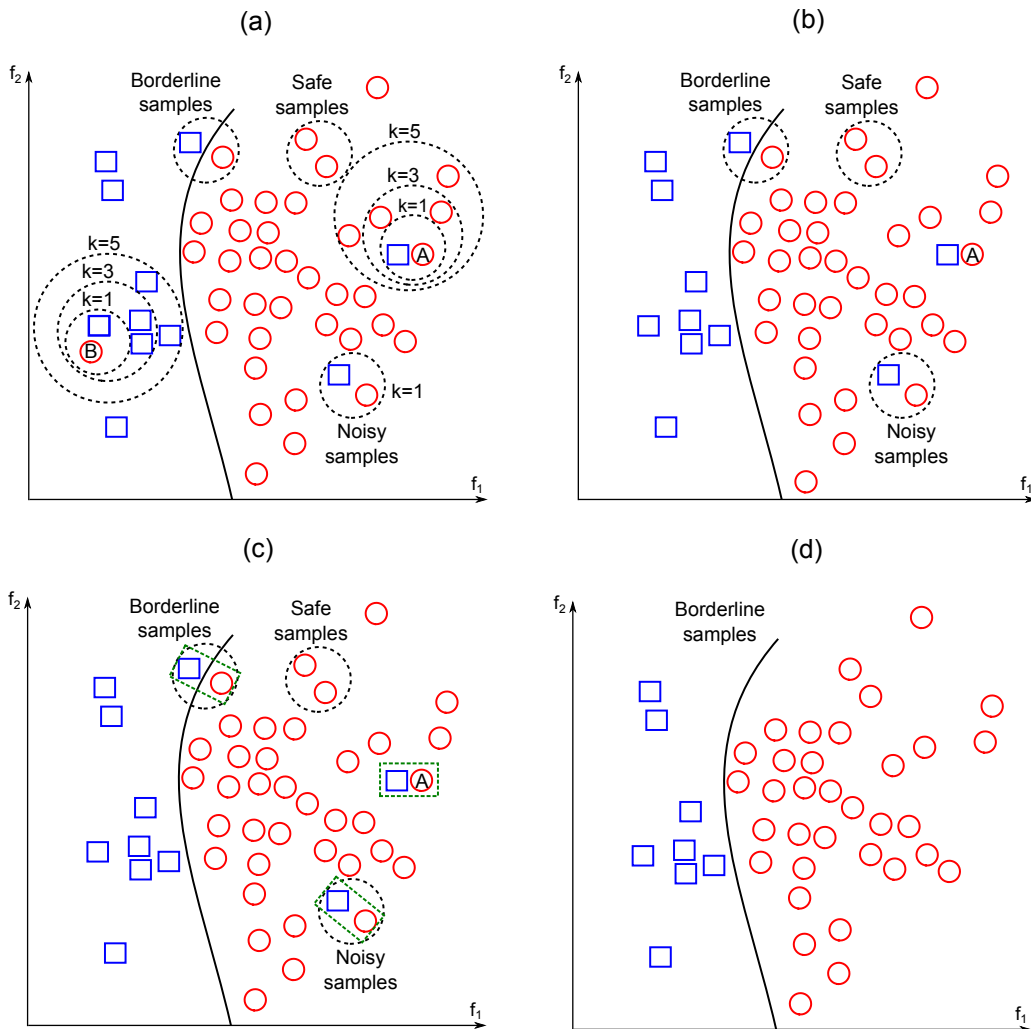

Fig. S2 An example of ITS method. (a) Original data; (b) After applying sampling step; (c) The identified Tomek Links, (d) The dataset after removing Tomek links.

Figure S2 illustrates an example of the ITS method. This figure shows the difference between borderline, safe and noisy samples (see Fig. S2 (a)). As shown in Fig. S2(a), the sample/point (A) when  $k = 5$  or  $k = 3$  is not classified as a danger sample, while the sample is classified as a danger sample when  $k = 1$ .

On the contrary, the sample B is classified as a danger sample when  $k = 1, 3,$  or  $5$ . Hence, in the sampling step, when  $k = 5$ , the sample B is removed while sample A is preserved when the majority class samples are under-sampled as shown in Fig. S2(b). Similarly, the danger points in minority class will not be replicated. Figure S2(c) shows a data cleanup step. As shown in Fig. Fig. S2(c), there are three Tomek links are identified and represented by a green dashed box. Figure S2(d) shows the data after the data cleaning step, where the overlapping data samples are removed. As shown in Fig. S2(d), this step produces separated classes, which improves the classification performance.

### 3-Supplementary Figure S3

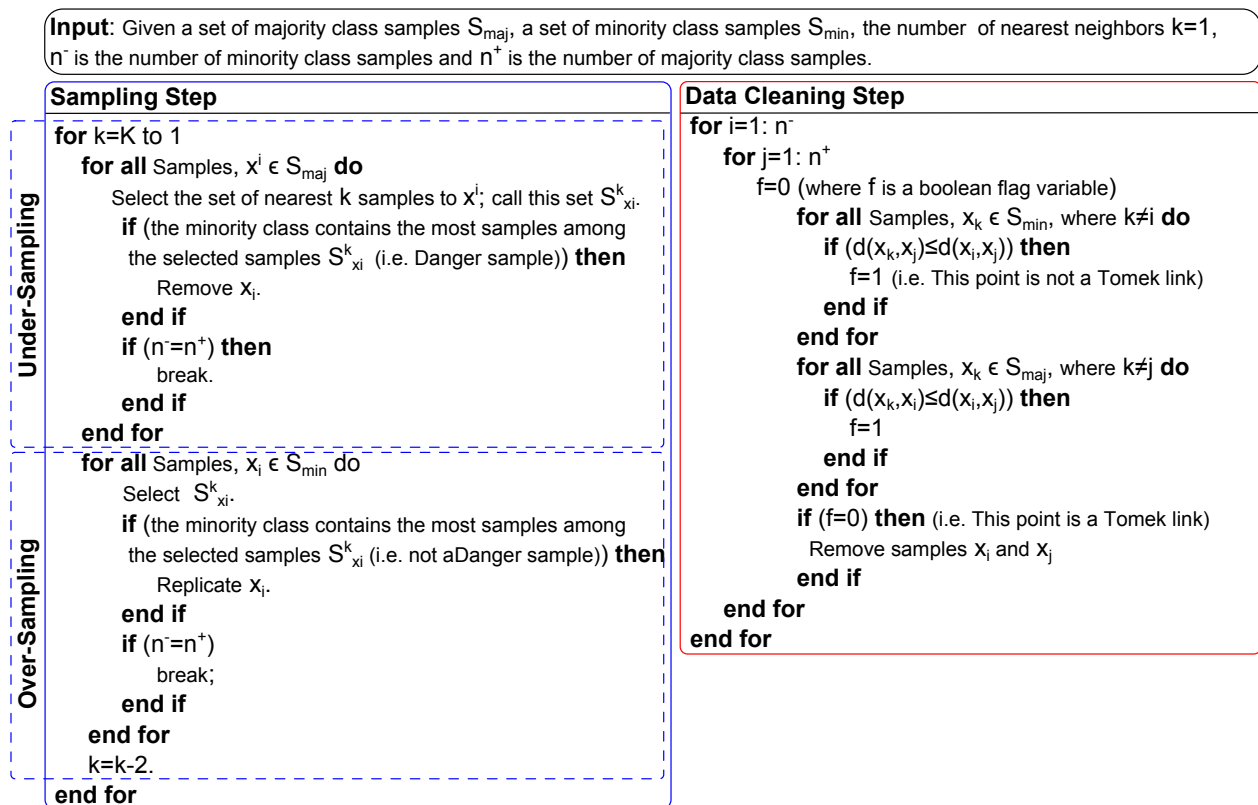

Fig. S3 ITS algorithm.

#### 4-Supplementary Figure S4

---

##### Bagging Classifier Algorithm

---

**Input:** Given a training set  $X = \{(x_1, y_1), \dots, (x_M, y_M)\}$ , where  $y_i$  is the class label of the sample  $x_i$  and  $M$  denotes the total number of samples in the training set.

**Training Step**

**while** ( $t < \text{Max}_{\text{iter}}$ ), where  $\text{Max}_{\text{iter}}$  is the maximum number of iterations) **do**

    Select a sample  $S_t$  from  $X$ .

    Use  $S_t$  to train the current weak learner  $C_t$ .

**end while**

**Testing Step**

Given an unknown sample  $x_{\text{test}}$ .

Classify  $x_{\text{test}}$  using all weak learners ( $C_i, i=1, \dots, \text{Max}_{\text{iter}}$ ).

Combine the outputs of all weak learners to determine the final prediction.

---

Fig. S4 Bagging Classifier Algorithm.
